# Supplementary material for: Cysteine Leukotriene Receptor Antagonist-Montelukast Effects on Diabetic Retinal Microvascular Endothelial Cells Curtail Autophagy
Source: PubMed Central journal article supplement (PMC11549925; doi:10.1167/iovs.65.13.15), 2024-11-06
Supplement: iovs-65-13-15_s001.pdf [file iovs-65-13-15_s001.pdf]

**A**

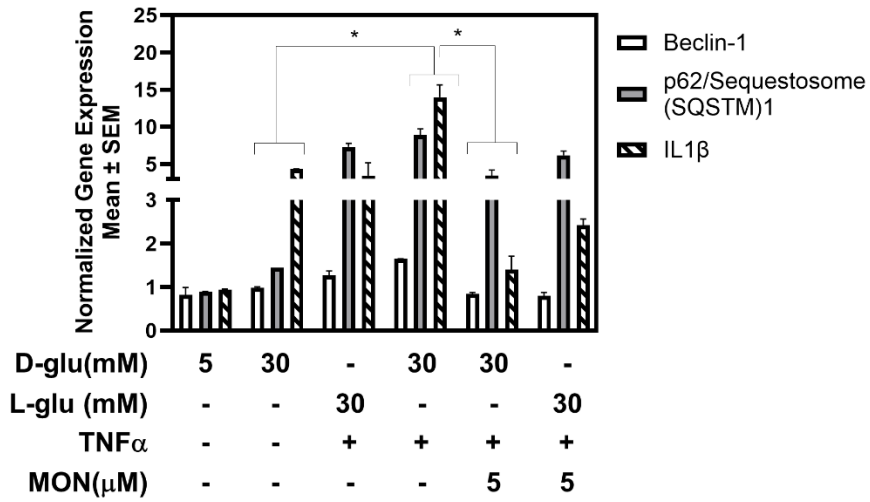

**B**

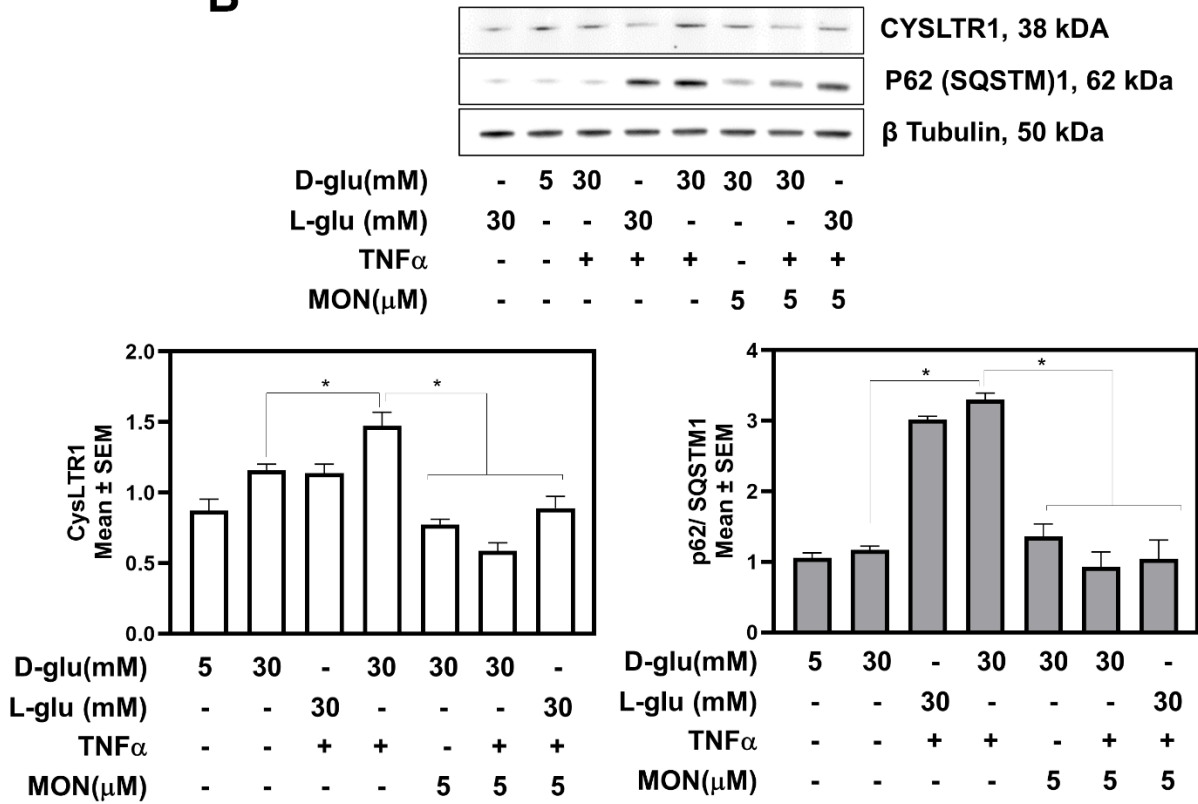

**Supplemental Figure 1. Specific synergistic increase in autophagy and inflammation under hyperglycemia and TNF- $\alpha$ -induced stress in HRECs.** (A). Gene expression of beclin-1, p62/SQSTM1, and IL-1 $\beta$  after challenging with various treatments. (B). Protein expression of CysLTR1 and p62/SQSTM1 after challenging with various treatments. \* $p < 0.05$ .
