# Supplementary material for: Cysteine Leukotriene Receptor Antagonist-Montelukast Effects on Diabetic Retinal Microvascular Endothelial Cells Curtail Autophagy
Source: PubMed Central journal article supplement (PMC11549925; doi:10.1167/iovs.65.13.15), 2024-11-06
Supplement: iovs-65-13-15_s002.pdf [file iovs-65-13-15_s002.pdf]

Raw data

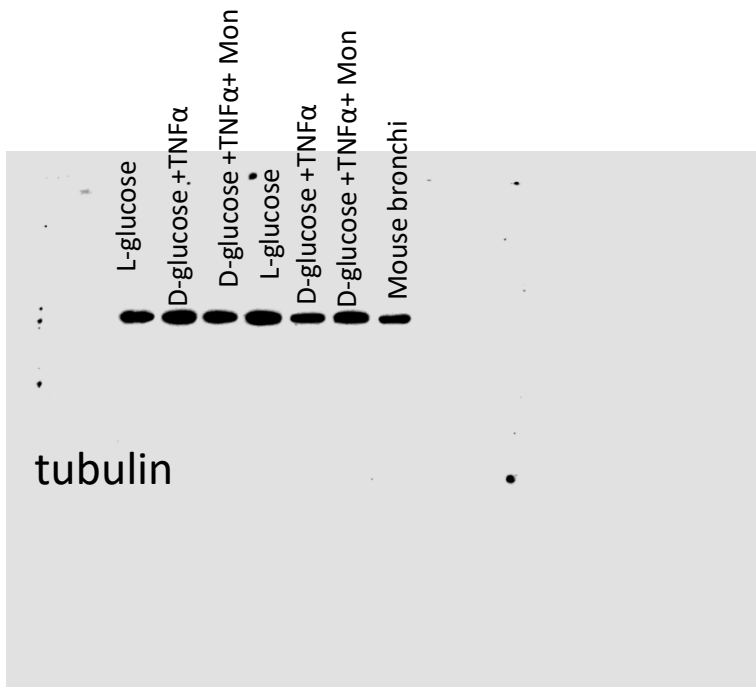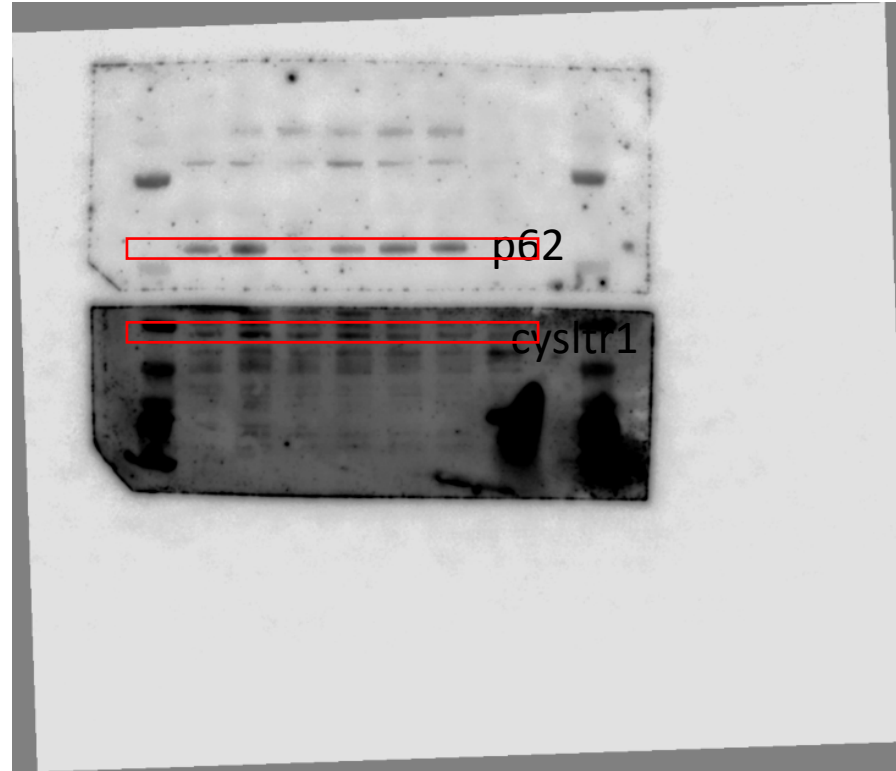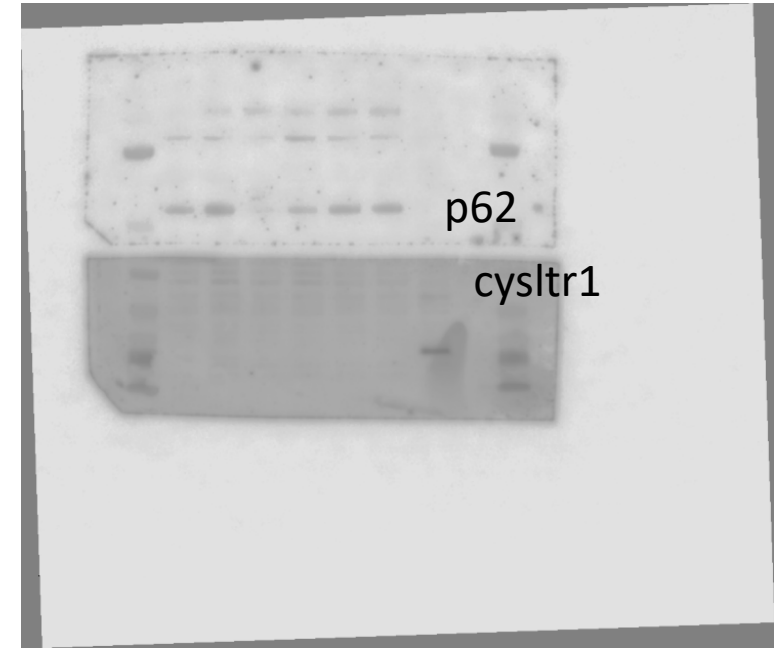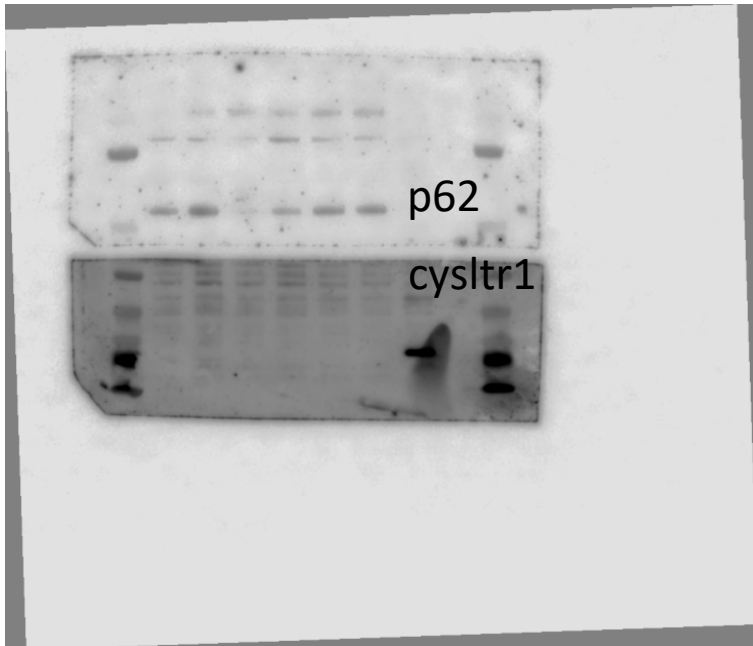

Figure 2 C

VE cadherin

tubulin

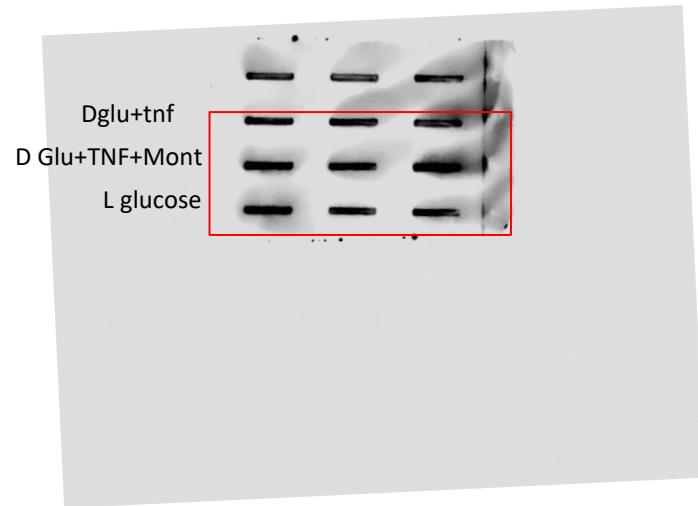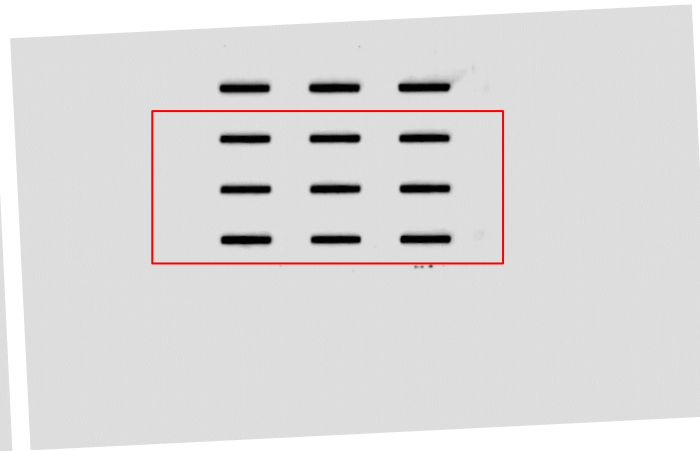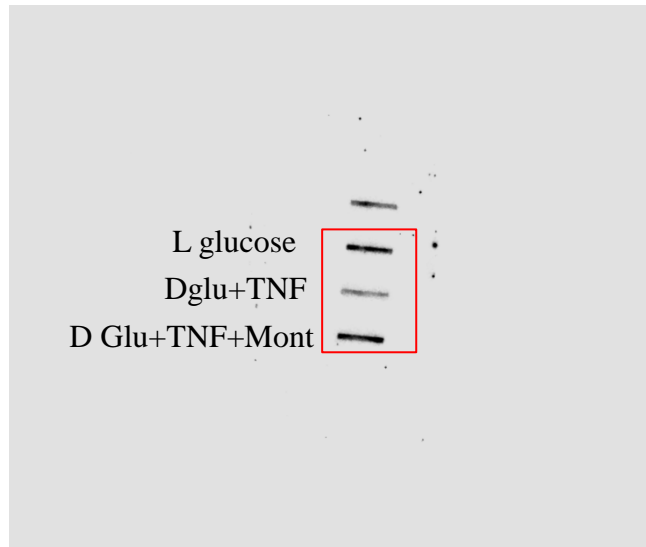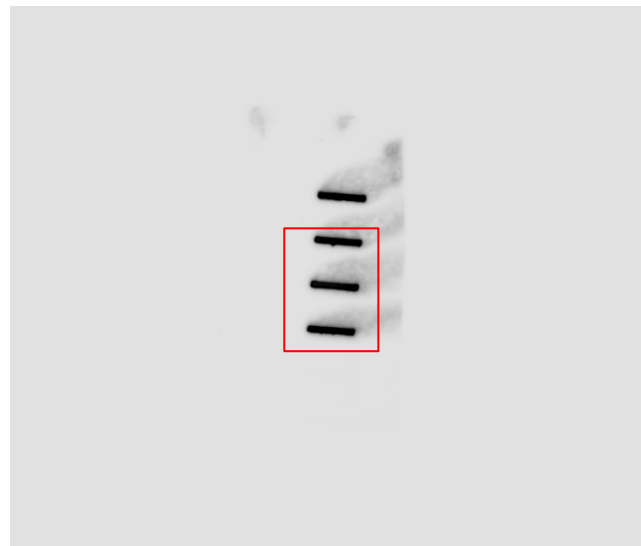

Figure 3H

# CYSLTR (2h,6h,24h) Comparison blots

CYSLTR1

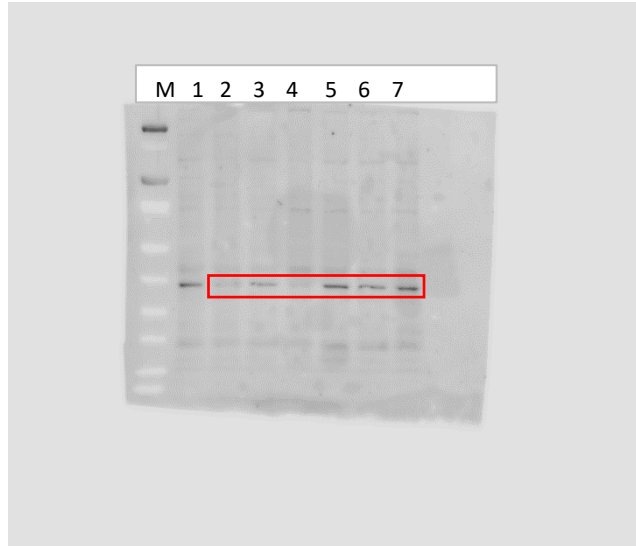

tubulin

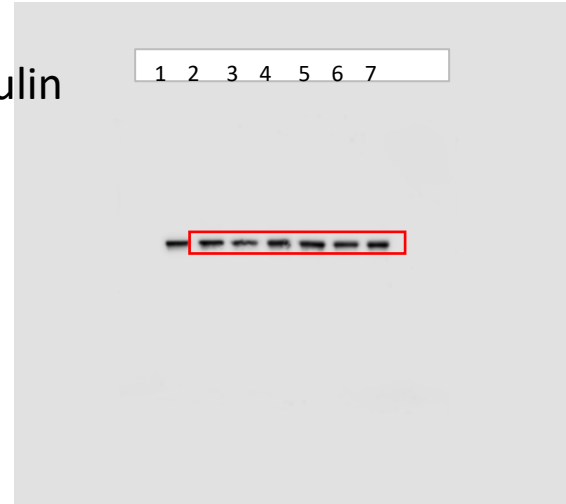

M: protein ladder

Lane1:DG 6h

Lane2:LG 2h

Lane3:LG 6h

Lane4:LG 24 h

Lane5: DG+TNF 2h

Lane6:DG+TNF 6h

Lane7:DG+TNF 24h

CYSLTR1

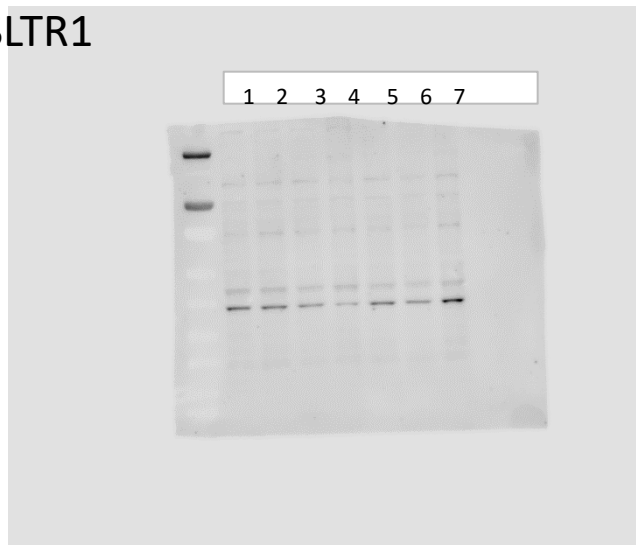

tubulin

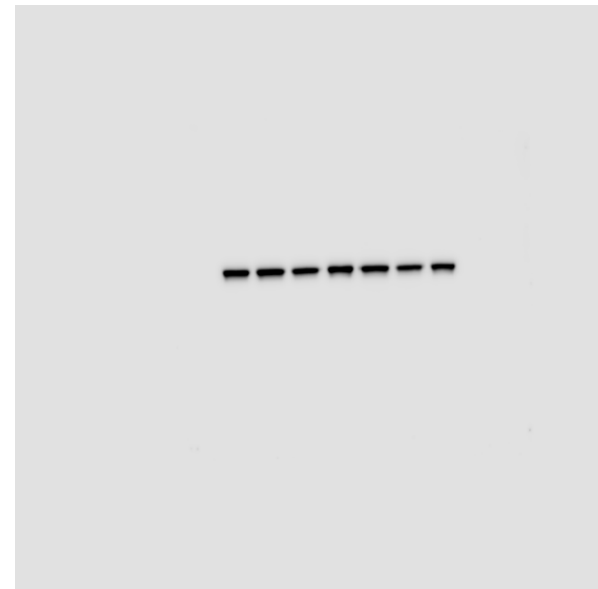

Abcam cysltr1  
HRE 6h treatment

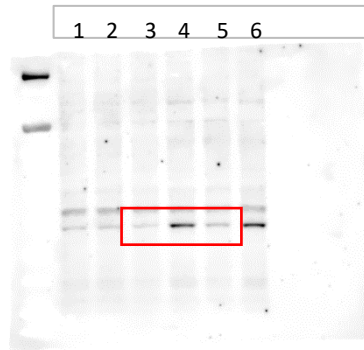

Lane1: Unstimulated cells  
Lane2: Mannitol 30mM  
Lane3: LG 30mM  
Lane4: DG+TNF  
Lane5: DG+TNF+MON5  
Lane6: DG+TNF+MON2.5

P62 HRE 6h  
treatment

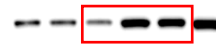

Tubulin 6h  
treatment

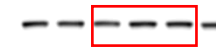

# Transfection EXp1

cysltr1

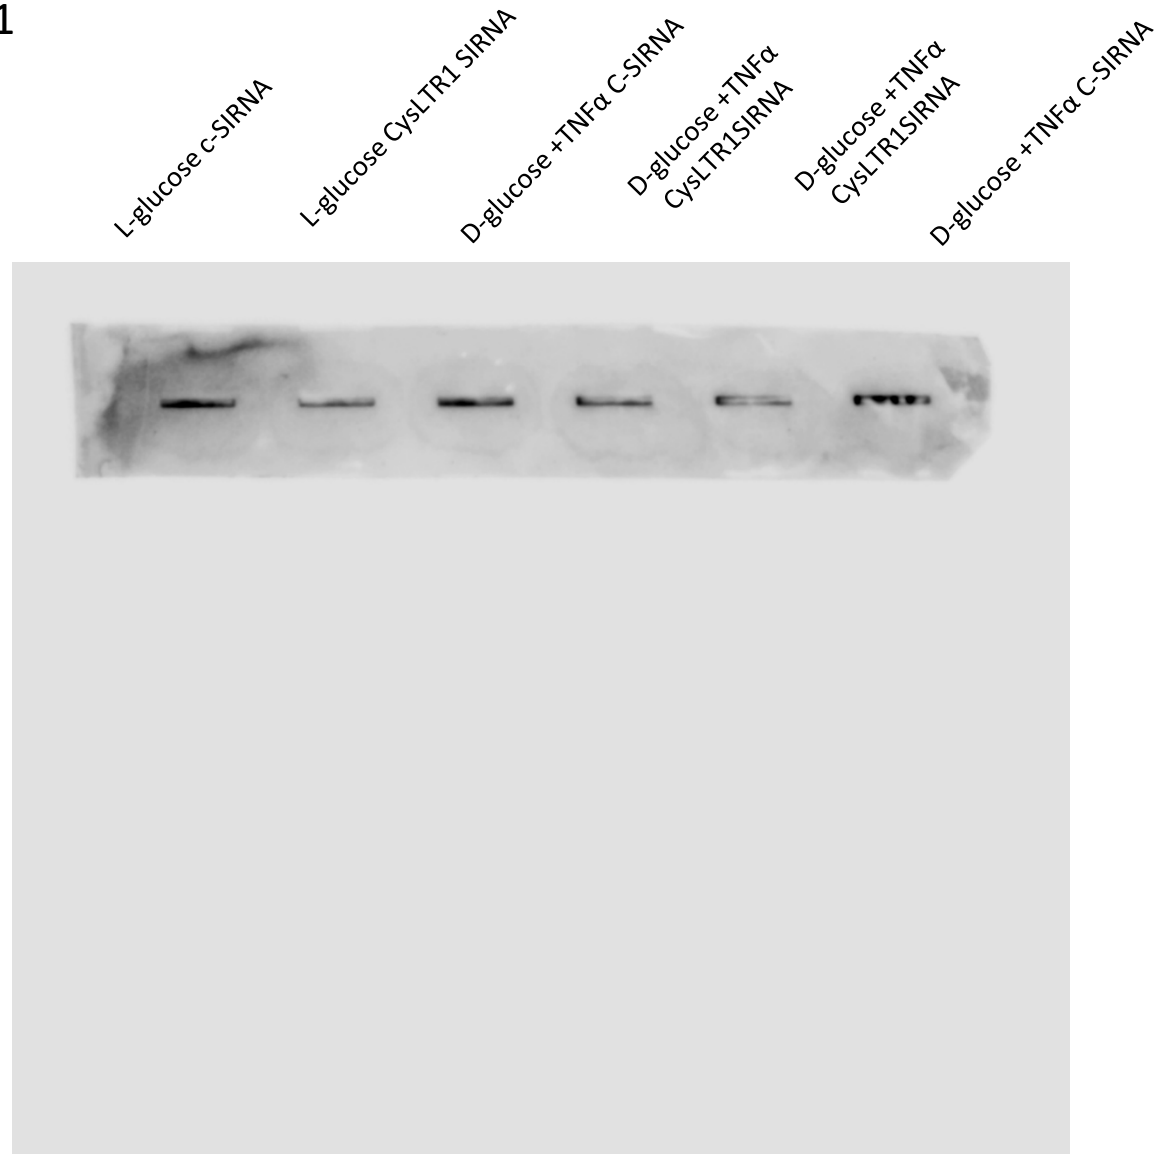

Figure 5B

# Transfection EXp1

L-glucose c-SIRNA  
L-glucose CysLTR1 SIRNA  
D-glucose + TNF $\alpha$  C-SIRNA  
D-glucose + TNF $\alpha$  CysLTR1 SIRNA  
D-glucose + TNF $\alpha$  CysLTR1 SIRNA  
D-glucose + TNF $\alpha$  C-SIRNA

p62

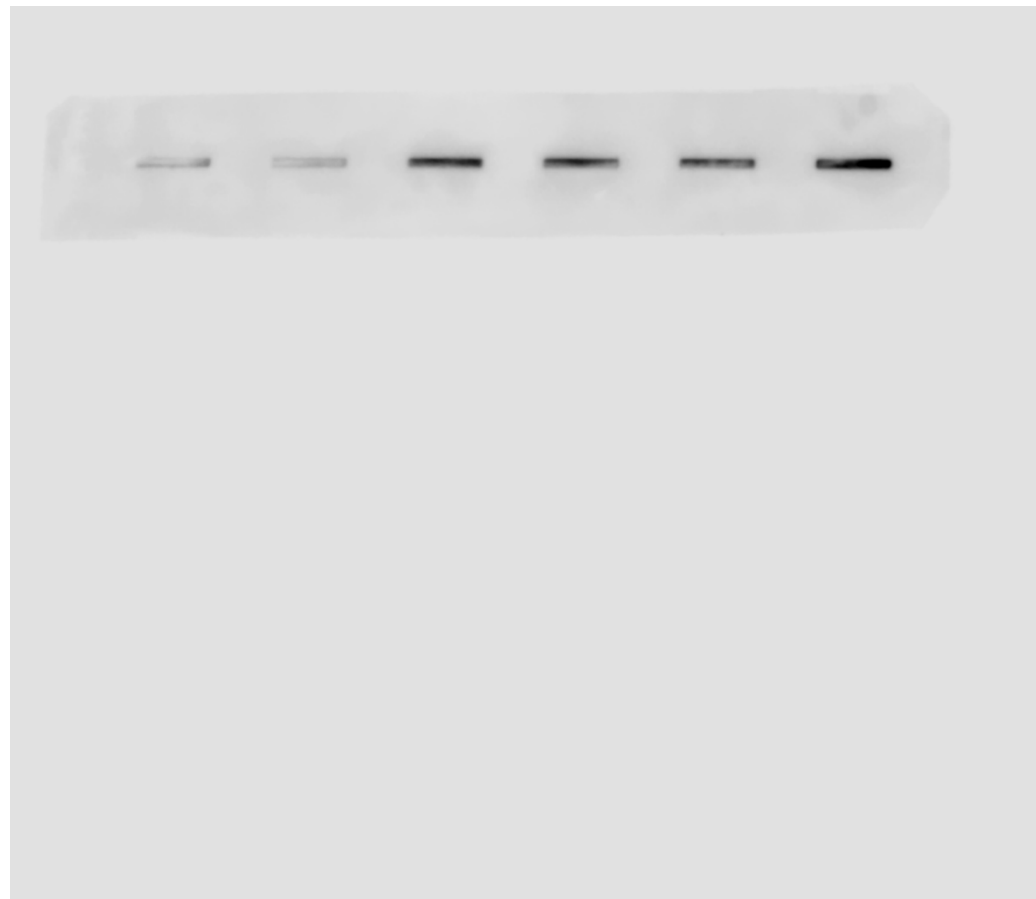

Figure 5C

Transfection EXp2

L-glucose c-SIRNA  
L-glucose CysLTR1 SIRNA  
D-glucose + TNF $\alpha$  C-SIRNA  
D-glucose + TNF $\alpha$  CysLTR1 SIRNA

CysLTR1

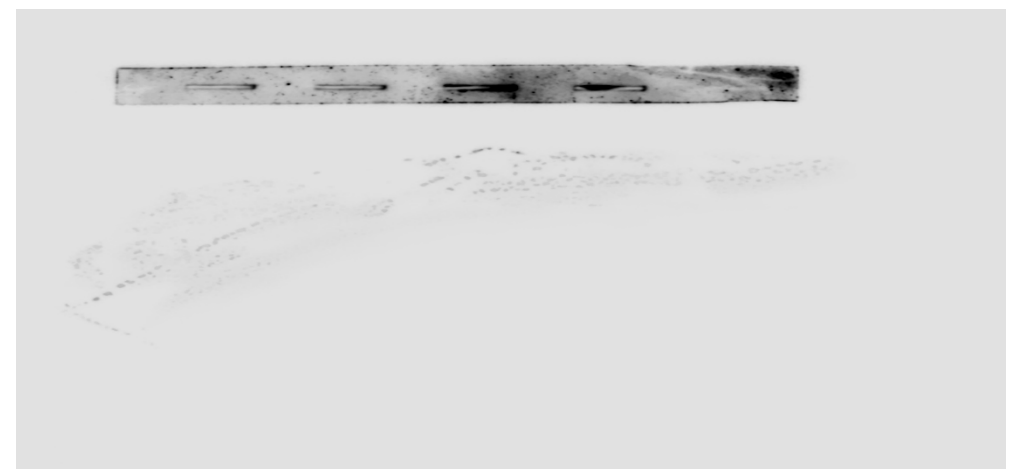

Tubulin

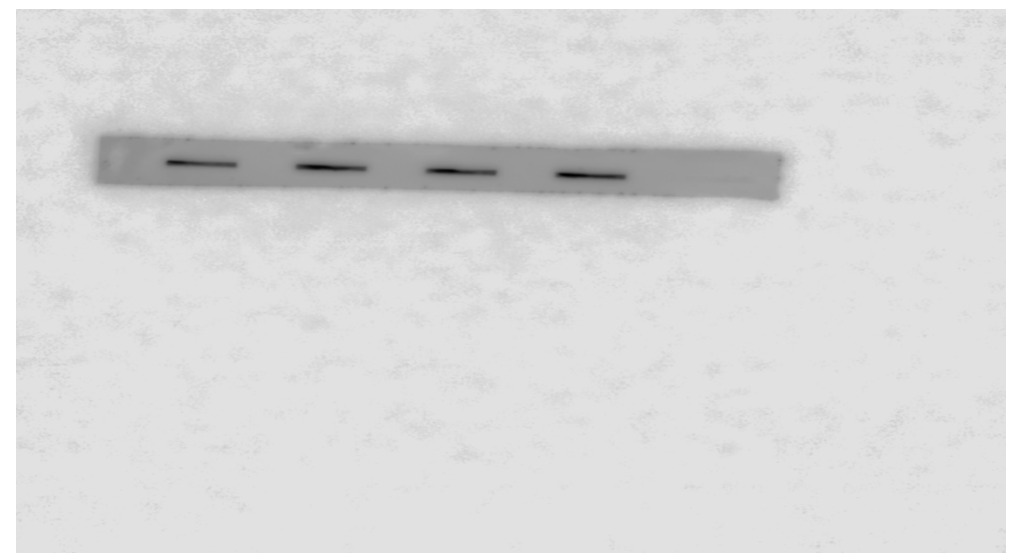

Figure 5B



# Transfection EXp2

L-glucose c-SIRNA  
L-glucose CysLTR1 SIRNA  
D-glucose + TNF $\alpha$  C-SIRNA  
D-glucose + TNF $\alpha$  CysLTR1 SIRNA

p62

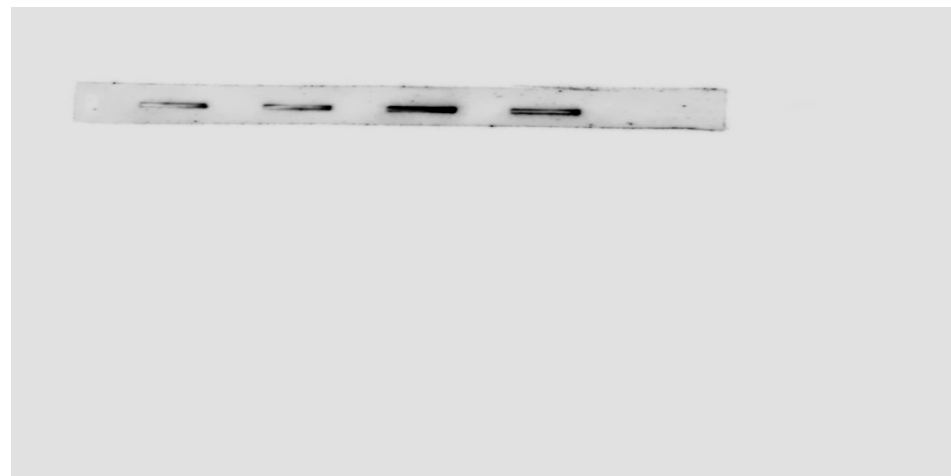

Tubulin

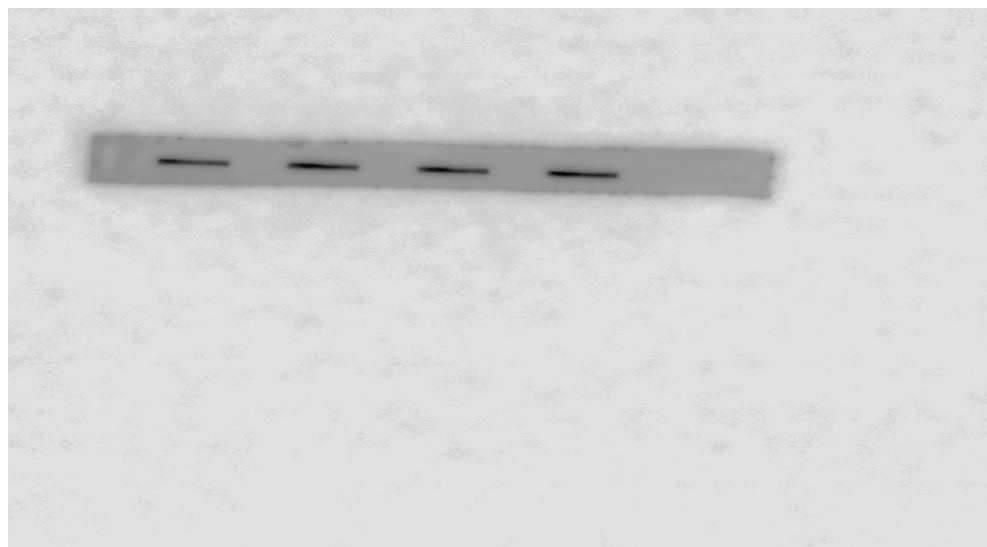

Figure 5C

Transfection EXp2

L-glucose c-SIRNA  
L-glucose CysLTR1 SIRNA  
D-glucose + TNF $\alpha$  C-SIRNA  
D-glucose + TNF $\alpha$   
CysLTR1SIRNA

Tubulin

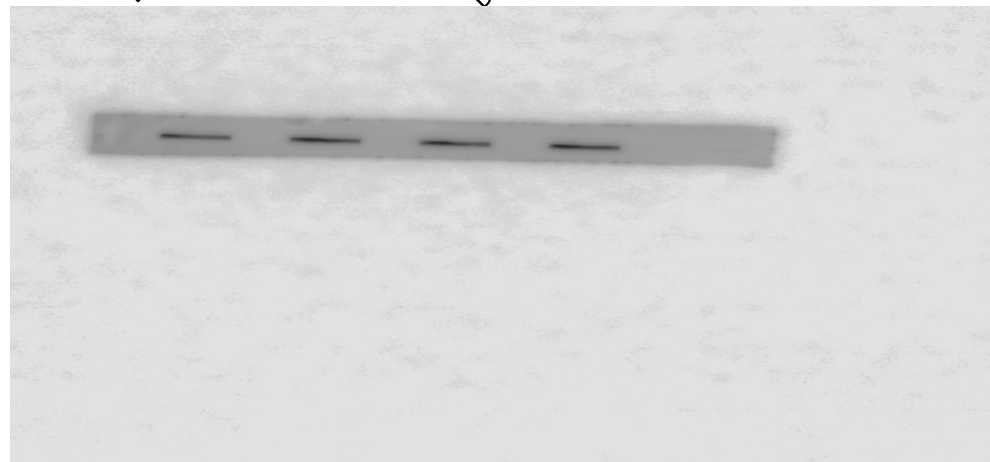

Figure 5

# CYSLTR1

SET1

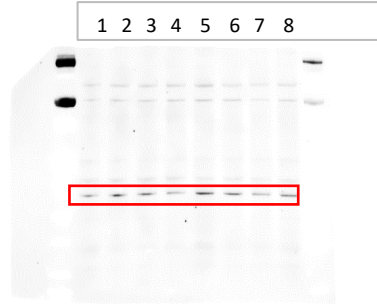

# Tubulin

1 2 3 4 5 6 7 8

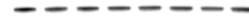

# SQSTM(P62)

1 2 3 4 5 6 7 8

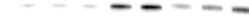

SET2

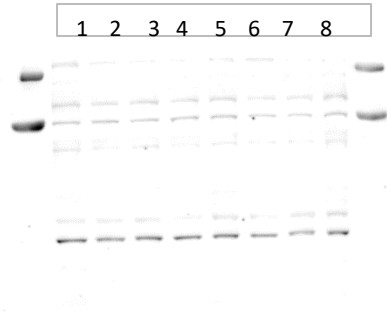

1 2 3 4 5 6 7 8

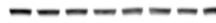

1 2 3 4 5 6 7 8

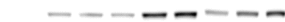

SET3

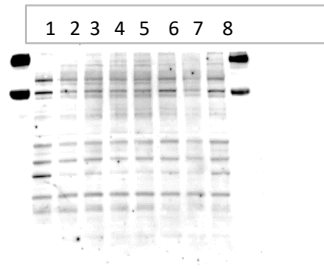

1 2 3 4 5 6 7 8

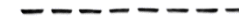

1 2 3 4 5 6 7 8

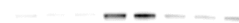

- Lane1:LG
- Lane2:DG 5mM
- Lane3:DG30mM
- Lane4:LG+TNF
- Lane5:DG+TNF
- Lane6:DG+MON
- Lane7:DG+TNF+MON
- Lane8:LG+TNF+MON
